# Supplementary material for: LINC00969 inhibits proliferation with metastasis of breast cancer by regulating phosphorylation of PI3K/AKT and ILP2 expression through HOXD8
Source: PeerJ journal article supplement (doi:10.7717/peerj.16679), 2023-12-18
Supplement: MIQE_checklist.pdf [file MIQE_checklist.pdf]

| ITEM TO CHECK                                                     | IMPORTANCE | CHECKLIST                                                                                   |
|-------------------------------------------------------------------|------------|---------------------------------------------------------------------------------------------|
| <b>EXPRIMNETAL DESIGN</b>                                         |            |                                                                                             |
| Definition of experiment and control group                        | E          | Cell culture and transfection section, line87-89                                            |
| Number within each group                                          | E          | Cell growth with proliferation assay section, line 131                                      |
| Assay carried out by core lab or investigator's lab?              | D          | Western blotting section, line 146                                                          |
| Acknowledgement of author's contributions                         | D          | None                                                                                        |
| <b>SAMPLE</b>                                                     |            |                                                                                             |
| Description                                                       | E          |                                                                                             |
| Volume /mass of samples processed                                 | D          | Cell culture and transfection section, line 89                                              |
| Microdissection or macrodissection                                | E          | Transwell assay of cell migration and invasion section, line 146                            |
| Processing procedure                                              | E          |                                                                                             |
| If frozen-how and how quickly?                                    | E          | Quantitative reverse transcription-polymerase chain reaction (qRT-PCR) section, line 99     |
| If fixed-with what how quickly?                                   | E          | Quantitative reverse transcription-polymerase chain reaction (qRT-PCR) section, line 101    |
| Sample storage conditions and durarion especially for fipe sample | E          | Quantitative reverse transcription-polymerase chain reaction (qRT-PCR) section, line 101    |
| <b>NUCLEIC ACID EXTRACTION</b>                                    |            |                                                                                             |
| Procedure and/or details of any modifications                     | E          | Quantitative reverse transcription-polymerase chain reaction (qRT-PCR) section, line 98-104 |
| Name of kit and details of any modifications                      | E          | Quantitative reverse transcription-polymerase chain reaction (qRT-PCR) section, line 99-100 |
| Source of additional reagents used                                | D          | Quantitative reverse transcription-polymerase chain reaction (qRT-PCR) section, line 99     |
| Details of DNase or RNase treatment                               | E          | Quantitative reverse transcription-polymerase chain reaction (qRT-PCR) section, line 99     |
| Contamination assessment (DNA or RNA)                             | E          | Quantitative reverse transcription-polymerase chain reaction (qRT-PCR) section, line 102    |
| Nucleic acid quantification                                       | E          | Quantitative reverse transcription-polymerase chain reaction (qRT-PCR) section, line 104    |
| Instrument and method                                             | E          | Quantitative reverse transcription-polymerase chain reaction (qRT-PCR) section, line 104    |
| Purity(A260/A280)                                                 | D          | Quantitative reverse transcription-polymerase chain reaction (qRT-PCR) section, line 100    |
| Yield                                                             | D          | Quantitative reverse transcription-polymerase chain reaction (qRT-PCR) section, line 101    |
| RNA integrity method/instrument                                   | E          | Quantitative reverse transcription-polymerase chain reaction (qRT-PCR) section, line 102    |
| RIN/RQI or Cq of 3' and 5'transcripts                             | E          | Quantitative reverse transcription-polymerase chain reaction (qRT-PCR) section, line 103    |
| Electrophoresis traces                                            | D          | Quantitative reverse transcription-polymerase chain reaction (qRT-PCR) section, line 102    |

|                                                   |   |                                                                                              |
|---------------------------------------------------|---|----------------------------------------------------------------------------------------------|
| Inhibition testing (Cq dilutions, spike or other) | E | Quantitative reverse transcription-polymerase chain reaction (qRT-PCR) section, line 100     |
| <b>REVERSE TRANSCRIPTION</b>                      |   |                                                                                              |
| Complete reaction conditions                      | E | Quantitative reverse transcription-polymerase chain reaction (qRT-PCR) section, line 104-107 |
| Amount of RNA and reaction volume                 | E | Quantitative reverse transcription-polymerase chain reaction (qRT-PCR) section, line 105     |
| Priming oligonucleotide and concentration         | E | Quantitative reverse transcription-polymerase chain reaction (qRT-PCR) section, line 125     |
| Reverse transcriptase and concentration           | E | Quantitative reverse transcription-polymerase chain reaction (qRT-PCR) section, line 106-107 |
| Temperature and time                              | E | Quantitative reverse transcription-polymerase chain reaction (qRT-PCR) section, line 115-116 |
| Manufacture of reagents and catalogue numbers     | D |                                                                                              |
| Cqs with and without RT                           | D |                                                                                              |
| Storage conditions of cDNA                        | D | Quantitative reverse transcription-polymerase chain reaction (qRT-PCR) section, line 101     |
| <b>qPCR TARGET INFORMATION</b>                    |   |                                                                                              |
| If multiplex efficiency and LOD of each assay     | E | Yes                                                                                          |
| Sequence accession number                         | E | Gene ID: 440993                                                                              |
| Location of amplicon                              | D | Quantitative reverse transcription-polymerase chain reaction (qRT-PCR) section, line 109-110 |
| Amplicon length                                   | E | Quantitative reverse transcription-polymerase chain reaction (qRT-PCR) section, line 107     |
| <i>In silico</i> specificity screen               | E | Quantitative reverse transcription-polymerase chain reaction (qRT-PCR) section, line 111     |
| Pseudogenes, retropseudogenes or other homologs   | D |                                                                                              |
| Sequence alignment                                | D |                                                                                              |
| Secondary structure analysis of amplicon          | D |                                                                                              |
| Location of each primer by exon or intron         | E | Quantitative reverse transcription-polymerase chain reaction (qRT-PCR) section, line 117-118 |
| What splice variants are targeted                 | E | Quantitative reverse transcription-polymerase chain reaction (qRT-PCR) section, line 111-112 |
| <b>qPCR OLIGONUCLEOTIDES</b>                      |   |                                                                                              |
| Primer sequences                                  | E | Quantitative reverse transcription-polymerase chain reaction (qRT-PCR) section, line 118-121 |
| Rtprimer DB Identification number                 | D |                                                                                              |
| Probe sequence                                    | D |                                                                                              |
| Location and identity of any modifications        | E |                                                                                              |
| Manufacture of oligonucleotides                   | D |                                                                                              |
| Purification method                               | D |                                                                                              |
| <b>qPCR PROTOCOL</b>                              |   |                                                                                              |

|                                                          |   |                                                                                                    |
|----------------------------------------------------------|---|----------------------------------------------------------------------------------------------------|
| Complete reaction conditions                             | E | Quantitative reverse transcription-polymerase chain reaction (qRT-PCR) section, line 112-114       |
| Reaction volume and amount of cDNA/DNA                   | E | Quantitative reverse transcription-polymerase chain reaction (qRT-PCR) section, line 105-106       |
| Primer,(probe),mg <sup>++</sup> ,and dNTP concentrations | E | Quantitative reverse transcription-polymerase chain reaction (qRT-PCR) section, line 113, 114, 125 |
| Polymerase identity and concentration                    | E | Quantitative reverse transcription-polymerase chain reaction (qRT-PCR) section, line 113-114       |
| Buffer/kit identity and manufacturer                     | E | Quantitative reverse transcription-polymerase chain reaction (qRT-PCR) section, line 113-114       |
| Exact chemical constitution of the buffer                | D |                                                                                                    |
| Additives (SYBRGREEN,DMSO)                               | E | None                                                                                               |
| Manufacture of plates/tubes and catalog number           | D | Quantitative reverse transcription-polymerase chain reaction (qRT-PCR) section, line 114-115       |
| Complete thermocycling parameters                        | E | Quantitative reverse transcription-polymerase chain reaction (qRT-PCR) section, line 115-116       |
| Reaction setup (manual/robotic)                          | D | Quantitative reverse transcription-polymerase chain reaction (qRT-PCR) section, line 115-116       |
| Manufacture of qpcr instrument                           | E | Quantitative reverse transcription-polymerase chain reaction (qRT-PCR) section, line 112-113       |
| <b>qPCR VALIDATION</b>                                   |   |                                                                                                    |
| Evidence of optimisation(from gradients)                 | D | Quantitative reverse transcription-polymerase chain reaction (qRT-PCR) section, line 116           |
| Specificity(gel,sequence,melt,or digest)                 | E | Quantitative reverse transcription-polymerase chain reaction (qRT-PCR) section, line 101-102       |
| For SYBR green GREEN I,cq of the NTC                     | E |                                                                                                    |
| Standard curves with slope and y-intercept               | E | Quantitative reverse transcription-polymerase chain reaction (qRT-PCR) section, line 121-122       |
| PCR efficiency calculated from slope                     | E | Quantitative reverse transcription-polymerase chain reaction (qRT-PCR) section, line 126           |
| Confidence interval for per efficiency or standard error | D |                                                                                                    |
| r <sup>2</sup> of standard curve                         | E | Quantitative reverse transcription-polymerase chain reaction (qRT-PCR) section, line 126           |
| Linear dynamic range                                     | E |                                                                                                    |
| Cq variation at lower limit                              | E |                                                                                                    |
| Confidence intervals throughout range                    | D |                                                                                                    |
| Evidence for limit of detection                          | E |                                                                                                    |
| If multiplex efficiency and LOD of each assay            | E |                                                                                                    |
| <b>DATA ANALYSIS</b>                                     |   |                                                                                                    |
| qPCR analysis program (source,version)                   | E | Quantitative reverse transcription-polymerase chain reaction (qRT-PCR) section, line 112-116       |
| Cq method determination                                  | E | Quantitative reverse transcription-polymerase chain                                                |

|                                                       |   |                                                                                              |
|-------------------------------------------------------|---|----------------------------------------------------------------------------------------------|
|                                                       |   | reaction (qRT-PCR) section, line 116                                                         |
| Outlier identification and disposition                | E |                                                                                              |
| Result of NTCs                                        | E |                                                                                              |
| Justification of number and choice of reference genes | E |                                                                                              |
| Description of normalisation method                   | E | Quantitative reverse transcription-polymerase chain reaction (qRT-PCR) section, line 112-116 |
| Number and concordance of biological replicates       | D |                                                                                              |
| Number and stage (RT or qpcr)of technical replicates  | E | Quantitative reverse transcription-polymerase chain reaction (qRT-PCR) section, line 127     |
| Repeatability (intra assay variation,)                | E |                                                                                              |
| Repeatability (intra assay variation,%CV)             | D |                                                                                              |
| Power analysis                                        | D |                                                                                              |
| Statistical methods for result significance           | E | Statistical analysis section, line 166.                                                      |
| Software(source,version)                              | E | Statistical analysis section, line 163-164.                                                  |
| Cq or raw data submission using RDML                  | D |                                                                                              |
